# Supplementary material for: From aqueous speciation to supramolecular assembly in alkaline earth-uranyl polyoxometalates
Source: Royal Society of Chemistry journal article supplement (doi:10.1039/c7cc05357f), 2017-01-01
Supplement: c7cc05357f1.pdf [file c7cc05357f1.pdf]

**Supplementary information for:**

**From Aqueous Speciation to Supramolecular Assembly in Alkaline Earth-Uranyl Polyoxometalates**

Clement Falaise,<sup>a,b,d</sup> Sarah M. Hickam,<sup>a,c</sup> Peter C. Burns,<sup>a,c</sup> and May Nyman<sup>\*a,b</sup>

- a) Energy Frontier Research Center, Materials Science of Actinides; URL: : msa-efrc.com*
- b) Department of Chemistry, Oregon State University, Gilbert Hall, Corvallis, Oregon 97331, United States. \* E-mail: may.nyman@oregonstate.edu*
- c) Department of Chemistry & Biochemistry, University of Notre Dame, Notre Dame, Indiana 46556, USA.*
- d) current address: Université de Rennes 1, Institut des Sciences Chimiques de Rennes (ISCR), Rennes, France*

## Experimental section

### Instrumentation

#### Scanning Electron Microscopy (SEM):

Electron micrographs of the crystalline materials were obtained from a Quanta 600F instrument (FEI) combining a scanning electron microscope and an energy-dispersive X-ray spectrometer (EDS).

**Small-Angle X-ray Scattering:** SAXS data were collected on an Anton Paar SAXSess instrument utilizing copper radiation ( $\text{CuK}\alpha$  ; 1.54178 Å) and line collimation. Solutions were measured in 1.5 mm glass capillaries. Pure water was used for the background and the scattering was typically measured for 30 min. The SAXSQWANT software was used for data collection, treatment, and preliminary analysis (normalization, primary beam removal, background subtraction, desmearing, and smoothing). The fits of the scattering data were carried out within IGOR Pro<sup>[a]</sup> Simulated scattering curves for the uranyl clusters ( $\text{U}_{24}$ ,  $\text{U}_{28}$ ,  $\text{U}_{40}$ ,  $\text{U}_{44}$ ) were calculated from the single-crystal X-ray structures using SolX<sup>[b]</sup>.

*[a] J. Ilavsky and P. R. Jemian, Journal of Applied Crystallography 2009, 42, 347-353.*

*[b] R. Zhang, P. Thiyagarajan and D. M. Tiede, Journal of Applied Crystallography 2000, 33, 565-568.*

**Raman spectroscopy:** Raman spectra were collected on a Thermo Scientific DXR Smart Raman spectrometer with a 780 nm laser source. Solutions and solids in glass vials were placed directly on the sample window for data collection (step size: 1  $\text{cm}^{-1}$ , range: 650–950  $\text{cm}^{-1}$ ).

#### Powder X-ray diffraction:

Powder X-ray diffraction spectra of crystalline samples were obtained from a Rigaku Ultima IV multipurpose X-ray diffraction system using  $\text{CuK}\alpha$  radiation ( $\lambda = 1.54056$  Å).

**Synthesis:** *Caution! Uranium nitrate is a radioactive and chemically toxic reactant, so precautions with suitable care and protection for handling such substances have been followed.*

Crystallization of uranyl-peroxide compounds:

Crystals of **Sr@U<sub>24</sub>** were synthesized by combining the aqueous solution of uranyl nitrate (0.4 mmol), SrCl<sub>2</sub> (0.1 mmol), H<sub>2</sub>O<sub>2</sub> (30%, 500  $\mu$ L,  $\sim$ 5 mmol), TMAOH (25%, 500  $\mu$ L,  $\sim$ 1.7 mmol) and 2 mL of DI water. Uranyl nitrate and SrCl<sub>2</sub> was dissolved in 2 mL of DI water. Then hydrogen peroxide is added to the solution under vigorous stirring, involving the formation of yellowish precipitate (studtite; UO<sub>2</sub>(O<sub>2</sub>)(H<sub>2</sub>O)<sub>2</sub>·4H<sub>2</sub>O). Then 0.5mL of TMAOH was added to the mixture. At that time, the solution becomes yellow and clear (**Figure SI8**). After 2 months, octahedral crystals (crystals of **Sr@U<sub>24</sub>**) are observed in the bottom of the glass vial (vial closed). The analysis of this solid by powder X-ray diffraction confirms the purity of this phase (**Figure SI12**). Yield:  $\sim$  30%

Crystals of **Sr-U-monomer** were synthesized by combining the aqueous solution of uranyl nitrate (0.4 mmol), SrCl<sub>2</sub> (0.1 mmol), H<sub>2</sub>O<sub>2</sub> (30%, 500  $\mu$ L,  $\sim$ 5 mmol), and TMAOH (25%, 1 mL,  $\sim$ 3.4 mmol) and 4 mL of DI water. Uranyl nitrate and SrCl<sub>2</sub> were dissolved in 2 mL of DI water. Then hydrogen peroxide is added to the solution with vigorous stirring, yielding a yellowish precipitate (studtite; UO<sub>2</sub>(O<sub>2</sub>)(H<sub>2</sub>O)<sub>2</sub>·4H<sub>2</sub>O). After several minutes of stirring, 1mL of TMAOH was added to the mixture. The solution becomes reddish and clear. After 24h, large crystals of **Sr-U-monomer** appear (**Figure SI3**). The unit cell determination (single crystal X-ray diffraction, more information below in the SCXRD section), as well as the powder X-ray diffraction (**Figure SI4**) confirm **Sr-U-monomer** is an isotype of the compound Ca<sub>2</sub>[UO<sub>2</sub>(O<sub>2</sub>)<sub>3</sub>]·9(H<sub>2</sub>O) that was reported prior (Burns *et al*, *Inorg. Chem.*, 2007, 46 (9), 3657).

**Investigation of the TMAOH/H<sub>2</sub>O<sub>2</sub>/ UO<sub>2</sub><sup>2+</sup>/EA<sup>2+</sup> (EA = Ca, Sr or Ba) system:**

Typically, uranyl nitrate (0.04 mmol) and alkaline earth chloride (0.01 mmol) is dissolved in 2 mL of DI water. Hydrogen peroxide (5 mmol) is added to this mixture under vigorous stirring. At that time, a yellowish precipitate (studtite) appears. After few minutes of stirring, TMAOH (1.7mmol) is added to the mixture. Just then, the solution becomes clear and yellow. These were the only reactants, and the final prepared solution has a U:AE:TMAOH ratio of 4:1:17.

Calcium solutions. After approximately 2 days, crystals of  $\text{Ca}_2[\text{UO}_2(\text{O}_2)_3]\cdot 9(\text{H}_2\text{O})$  crystallizes (**Figure SI5**). This solid then dissolved, followed by precipitation of  $\text{Ca}(\text{OH})_2$ . SAXS analysis of the remaining solution reveals the presence of  $\text{U}_{44}$  (Figure SI7)

Strontium solutions. After few days, a slight precipitate is observed on the bottom of glass vial. The SEM analysis of this reveals small particles with undefined shape with a molar ratio  $\text{Sr}/\text{U} \sim 1/2$ . The particle size increases with the reaction time. After 2 months, octahedral crystals (crystals of  $\text{Sr}@\text{U}_{24}$ ) are observed in the bottom of the glass vial.

Barium solutions. No precipitation is observed.

**Single-crystal X-ray diffraction:** Crystals were selected under a polarizing optical microscope. X-ray intensity data were collected at  $173 \pm 2$  K (cryostream system with gaseous nitrogen) on a Bruker DUO-APEX2 CCD area-detector diffractometer using  $\text{MoK}\alpha$  radiation ( $\lambda = 0.71073 \text{ \AA}$ ) for  $\text{Ca}@\text{U}_{24}$  (CSD-433306) and  $\text{Sr}@\text{U}_{24}$  (CSD-433305). These crystals were suitable for structure determination by single-crystal X-ray diffraction. Data reduction was accomplished using SAINT V7.53a<sup>[a]</sup>. The substantial redundancy in the data allowed a semi-empirical absorption correction SADABS V2.10<sup>[b]</sup> to be applied on the basis of multiple measurements of equivalent reflections. The structures were solved by direct methods and refined using the SHELXTL program suite. Heavy atoms (U, Sr, and Ca) were refined anisotropically during final refinements.

[a] SAINT Plus Version 7.53a, Bruker Analytical X-ray Systems, Madison, WI (2008)

[b] Heldrick, G., SADABS, Bruker-Siemens Area Detector Absorption and Other Correction, Version 2008/1 (2008)

**Table S11:** Crystal data and structure refinements for the **Sr@U<sub>24</sub>** and **Ca@U<sub>24</sub>**

| Compound                                                                                             | Sr@U <sub>24</sub>                                                                          | Ca@U <sub>24</sub>                                                                                          |
|------------------------------------------------------------------------------------------------------|---------------------------------------------------------------------------------------------|-------------------------------------------------------------------------------------------------------------|
| moiety formula                                                                                       | Sr <sub>12</sub> [(UO <sub>2</sub> )(O <sub>2</sub> )(OH)] <sub>24</sub> ·nH <sub>2</sub> O | Ca <sub>6</sub> Li <sub>12</sub> [(UO <sub>2</sub> )(O <sub>2</sub> )(OH)] <sub>24</sub> ·nH <sub>2</sub> O |
| empirical formula                                                                                    | <u>O<sub>805</sub>Sr<sub>48</sub>U<sub>96</sub></u>                                         | <u>Ca<sub>6</sub>Li<sub>8</sub>O<sub>172</sub>U<sub>24</sub></u>                                            |
| molecular weight [g mol <sup>-1</sup> ]                                                              | 39936.64                                                                                    | <u>8760.72</u>                                                                                              |
| crystal system                                                                                       | Cubic                                                                                       | <u>Tetragonal</u>                                                                                           |
| space group                                                                                          | <i>Fm</i> $\bar{3}$ <i>c</i>                                                                | <i>I4/m</i>                                                                                                 |
| a [Å]                                                                                                | 53.688 (7)                                                                                  | <u>18.282 (3)</u>                                                                                           |
| b [Å]                                                                                                | 53.688 (7)                                                                                  | <u>18.282 (3)</u>                                                                                           |
| c [Å]                                                                                                | 53.688 (7)                                                                                  | 26.436 (6)                                                                                                  |
| $\alpha$ [°]                                                                                         | 90                                                                                          | 90                                                                                                          |
| $\beta$ [°]                                                                                          | 90                                                                                          | 90                                                                                                          |
| $\gamma$ [°]                                                                                         | 90                                                                                          | 90                                                                                                          |
| V [Å <sup>3</sup> ]                                                                                  | 154751 (60)                                                                                 | 8836 (4)                                                                                                    |
| Z                                                                                                    | <u>8</u>                                                                                    | 2                                                                                                           |
| radiation type                                                                                       | Mo <i>K</i> $\alpha$                                                                        | Mo <i>K</i> $\alpha$                                                                                        |
| $\mu$ (mm <sup>-1</sup> )                                                                            | <u>23.41</u>                                                                                | <u>22.20</u>                                                                                                |
| crystal size (mm)                                                                                    | 0.21 × 0.11 × 0.09                                                                          | <u>0.25 × 0.2 × 0.2</u>                                                                                     |
| <i>T</i> <sub>min</sub> , <i>T</i> <sub>max</sub>                                                    | 0.639, 0.745                                                                                | <u>0.462, 0.745</u>                                                                                         |
| No. of measured,<br>independent and<br>observed [ <i>I</i> > 2 $\sigma$ ( <i>I</i> )]<br>reflections | <u>25848, 4589, 2513</u>                                                                    | <u>30783, 2614, 2169</u>                                                                                    |
| <i>R</i> <sub>int</sub>                                                                              | <u>0.134</u>                                                                                | <u>0.121</u>                                                                                                |
| <i>R</i> <sub>1</sub> / <i>wR</i> <sub>2</sub> [for <i>I</i> > 2 $\sigma$ ( <i>I</i> )]              | 0.0757 / 0.1873                                                                             | 0.0644 / 0.1621                                                                                             |
| <i>R</i> <sub>1</sub> / <i>wR</i> <sub>2</sub> [for all data]                                        | 0.1599 / 0.2359                                                                             | 0.0811 / 0.1731                                                                                             |
| GooF                                                                                                 | 1.066                                                                                       | 1.125                                                                                                       |
| largest diff. peak/hole [eÅ <sup>-3</sup> ]                                                          | <u>2.88, -4.66</u>                                                                          | <u>3.14, -2.76</u>                                                                                          |

**Table SI2.** Bond Valence Summary for **Ca@U<sub>24</sub>** and **Sr@U<sub>24</sub>**

**Ca@U<sub>24</sub>**

| Element                      | Bond Valence | Std dev. | R <sub>ij</sub> | b     | ref |
|------------------------------|--------------|----------|-----------------|-------|-----|
| U                            | 6.356        | 0.122    | 2.042           | 0.506 | 1   |
| Ca                           | 2.169        | 0.053    | 1.967           | 0.370 | 2   |
| $\mu_3$ -O,*<br>encapsulated | 0.750        | N/A      | 1.967           | 0.370 | 2   |

**Sr@U<sub>24</sub>**

| Element                                  | Bond Valence | Std dev. | R <sub>ij</sub> | b     | ref |
|------------------------------------------|--------------|----------|-----------------|-------|-----|
| U                                        | 6.233        | 0.081    | 2.042           | 0.506 | 1   |
| Sr,<br>encapsulated                      | 2.680        | 0.183    | 2.118           | 0.370 | 2   |
| Sr, interstitial                         | 2.002        | N/A      | 2.118           | 0.370 | 2   |
| $\mu_3$ -O,<br>encapsulated*             | 0.809        | 0.084    | 2.118           | 0.370 | 2   |
| $\mu_6$ -O,<br>encapsulated <sup>‡</sup> | 1.314        | 0.005    | 2.118           | 0.370 | 2   |

\* assigned as water

<sup>‡</sup> assigned as oxo, O<sup>2-</sup>

1. Burns, P., Ewing, R., & Hawthorne, F. (1997). The crystal chemistry of hexavalent uranium; polyhedron geometries, bond-valence parameters, and polymerization of polyhedra. *The Canadian Mineralogist*, 35, 1551-1570.
2. Brown, I., & Altermatt, D. (1985). Bond-valence parameters obtained from a systematic analysis of the Inorganic Crystal Structure Database. *Acta Crystallographica Section B*, 41(4), 244-247.

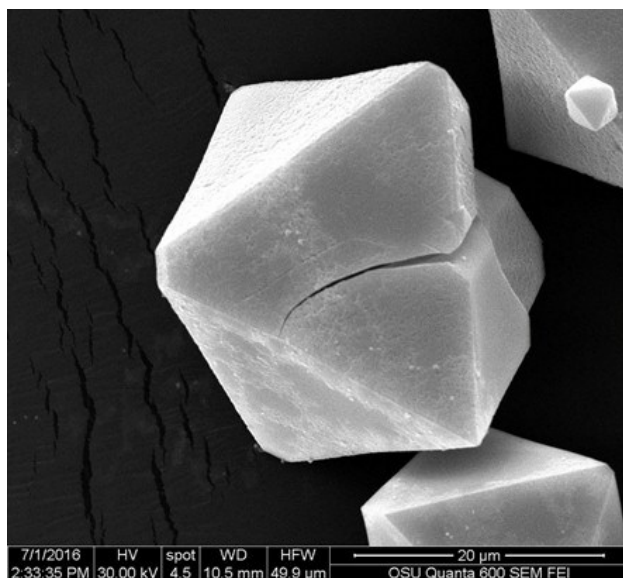

**Figure SI1.** SEM image of  $\text{Sr@U}_{24}$

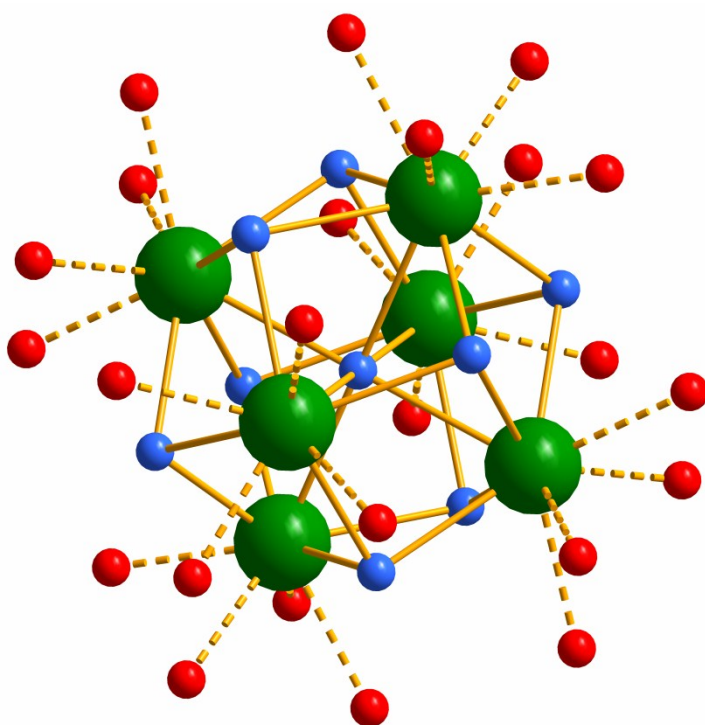

**Figure SI2.** Illustration of  $\text{Sr}_6(\text{H}_2\text{O})_9^{10+}$  polycation that is situated inside  $\text{Sr@U}_{24}$ . Green spheres are  $\text{Sr}^{2+}$ , blue spheres are  $\text{H}_2\text{O}$ , red spheres are  $\text{O}^{2-}$ . The dashed bonds are to the  $\gamma$ -oxos of the  $\text{U}_{24}$  shell.

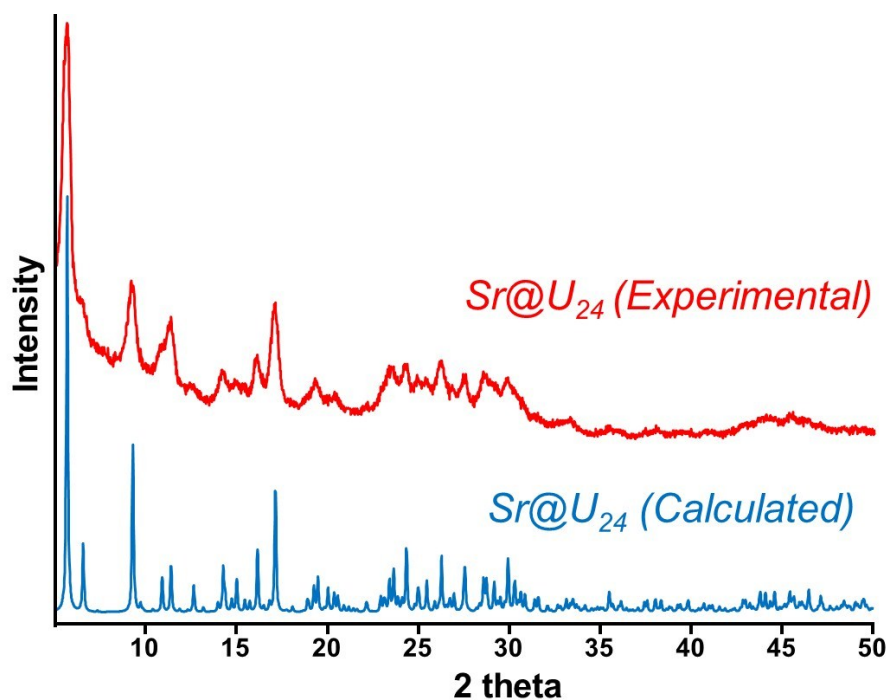

**Figure SI3.** Comparison of the experimental (red) and simulated (blue) powder XRD patterns of  $\text{Sr@U}_{24}$ . The simulated diagram was calculated from the single-crystal X-ray diffraction model using Mercury 3.6. The broadened experimental peaks is due to dehydration of the lattice waters that reside between the clusters.

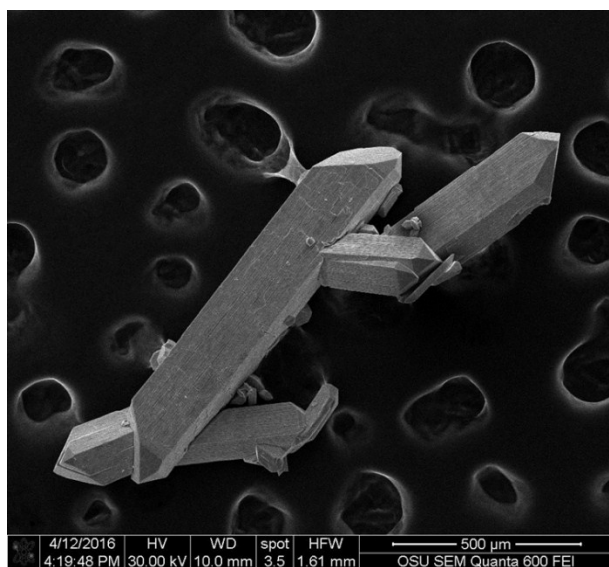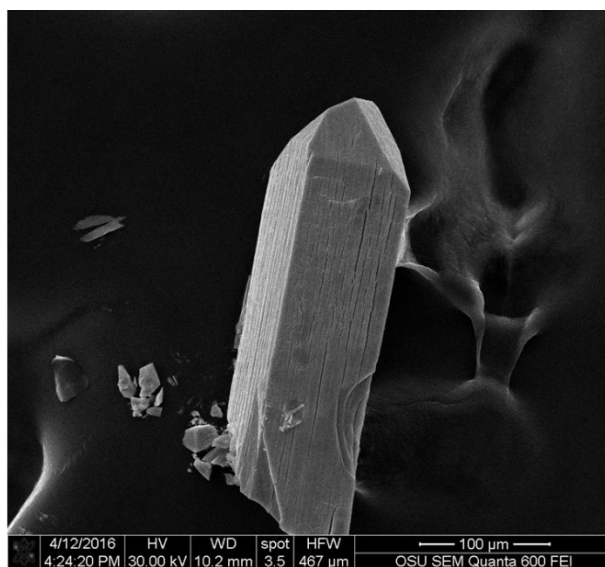

**Figure SI4.** SEM images of Sr-U-monomer



**Table SI3.** Comparison of the unit cell of  $\text{Ca}_2[\text{UO}_2(\text{O}_2)_3]\cdot 9(\text{H}_2\text{O})$  and **Sr-U-monomer**.

| Compound                                                            | $a$ (Å)   | $b$ (Å)    | $c$ (Å)    | $\alpha$ (°) | $\beta$ (°) | $\gamma$ (°) | $V(\text{Å}^3)$ |  |
|---------------------------------------------------------------------|-----------|------------|------------|--------------|-------------|--------------|-----------------|--|
| $\text{Ca}_2[\text{UO}_2(\text{O}_2)_3]\cdot 9(\text{H}_2\text{O})$ | 9.576(3)  | 12.172(3)  | 12.314(2)  | 90           | 90          | 90           | 1435.4(6)       |  |
| <b>Sr-U-monomer</b>                                                 | 9.8052(1) | 12.2817(1) | 12.5947(1) | 90           | 90          | 90           | 1516.71(3)      |  |

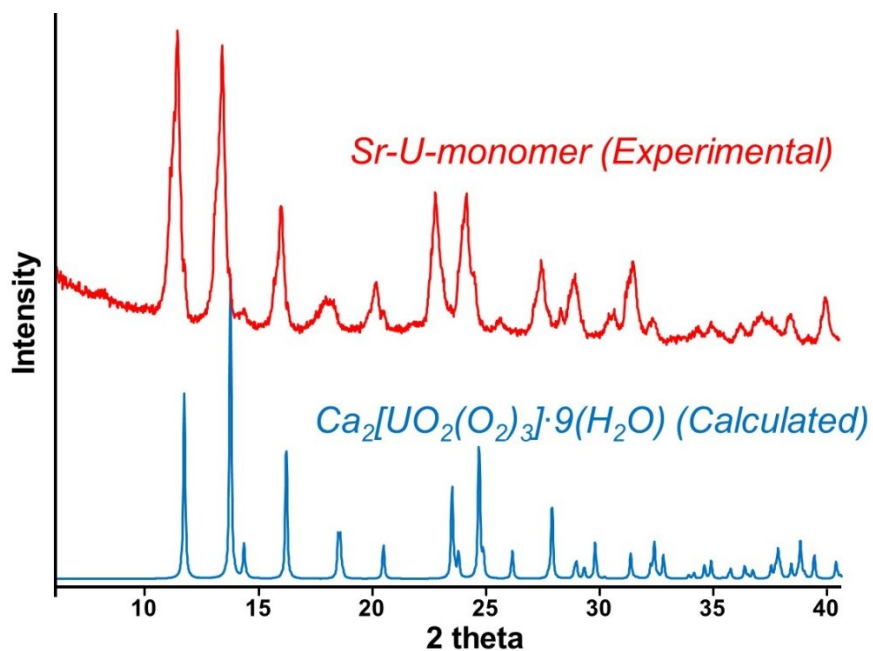

**Figure SI5.** Comparison of the experimental PXRD of **Sr-U-monomer** (red) with the simulated PXRD patterns of  $\text{Ca}_2[\text{UO}_2(\text{O}_2)_3]\cdot 9(\text{H}_2\text{O})$  (blue).

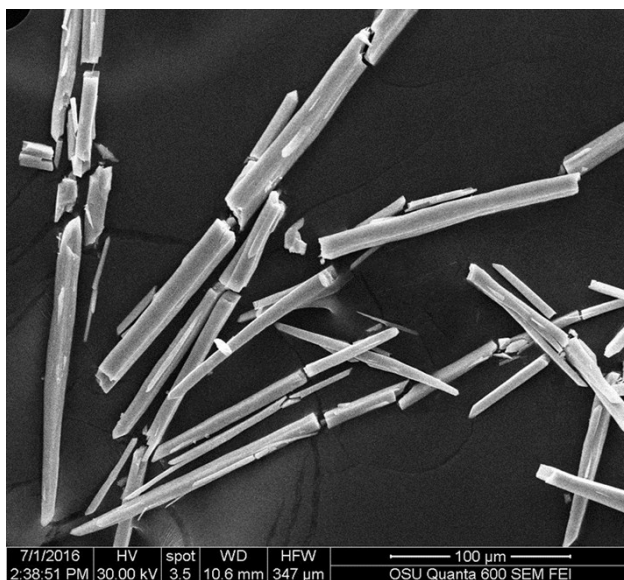

**Figure SI6.** SEM image of  $\text{Ca}_2[\text{UO}_2(\text{O}_2)_3] \cdot 9(\text{H}_2\text{O})$

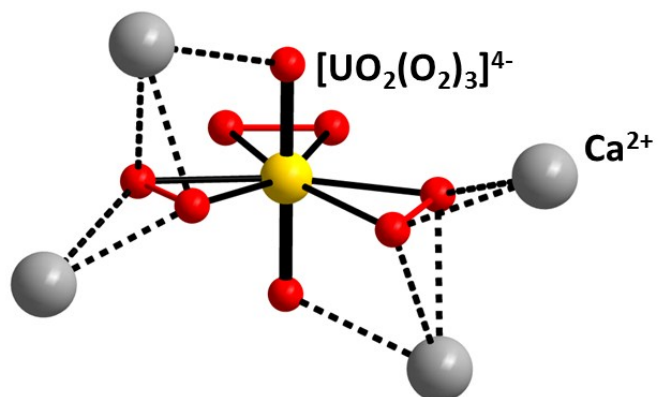

**Figure SI7.** View of the uranyl trioxide monomer in the crystal structure of  $\text{Ca}_2[\text{UO}_2(\text{O}_2)_3] \cdot 9(\text{H}_2\text{O})$ .

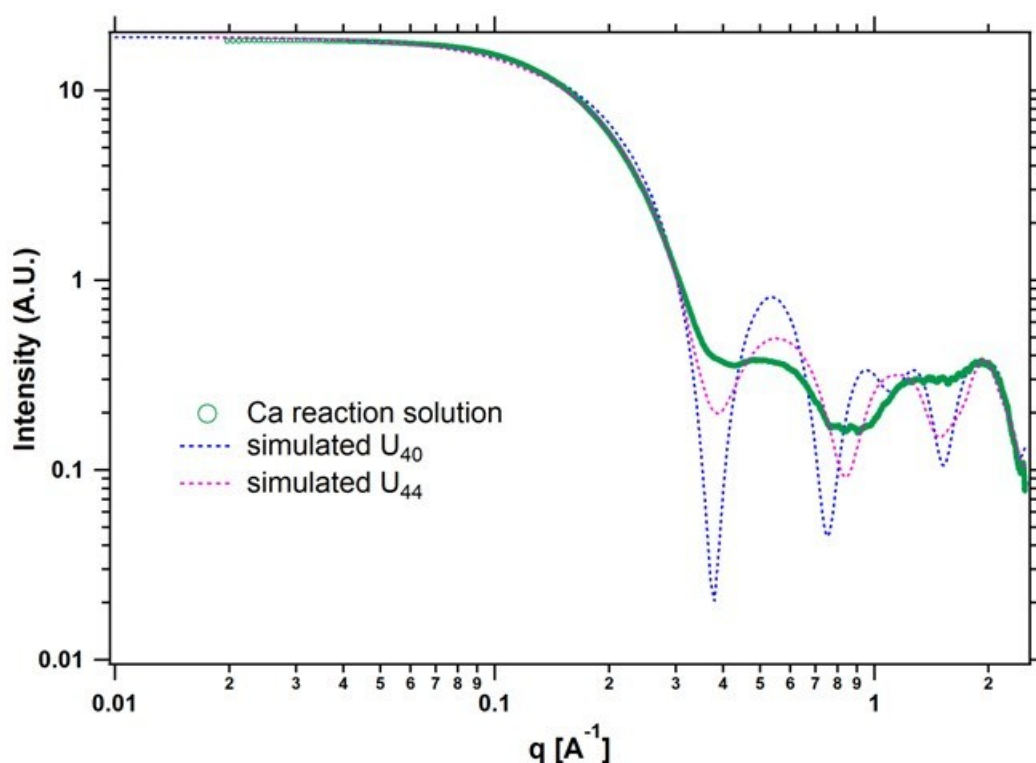

**Figure SI8.** Experimental scattering data for the reaction solution from which **Ca@U<sub>24</sub>** is obtained, along with simulated U<sub>40</sub> and U<sub>44</sub> for comparison. Based on this comparison, we surmise that the initial cluster that forms is U<sub>44</sub>.

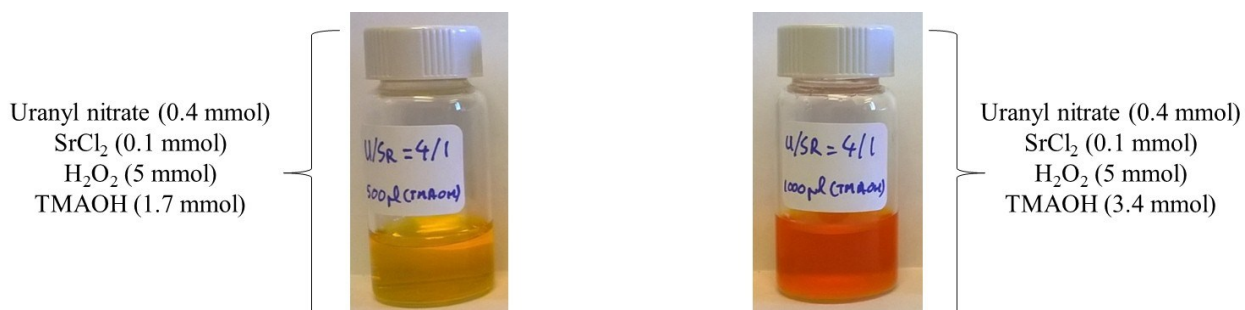

**Figure SI9. (Left)** Photo of the reaction solution “**Sr@U<sub>24</sub>**” (pH~10). **(Right)** Photo of the reaction solution “**Sr-U-monomer**” (pH~12). While the solution “**Sr@U<sub>24</sub>**” is clear yellow, the similar solution with the excess of TMAOH (solution “**Sr-U-monomer**”) is intense orange. This color difference is directly associated to the nature of uranyl species in solution. Typically, uranyl peroxide clusters exhibit a yellow color whereas uranyl trioxide monomers are orange. The comparison of these two pictures underlines clearly the impact of the pH (amount of TMAOH) on cluster formation.

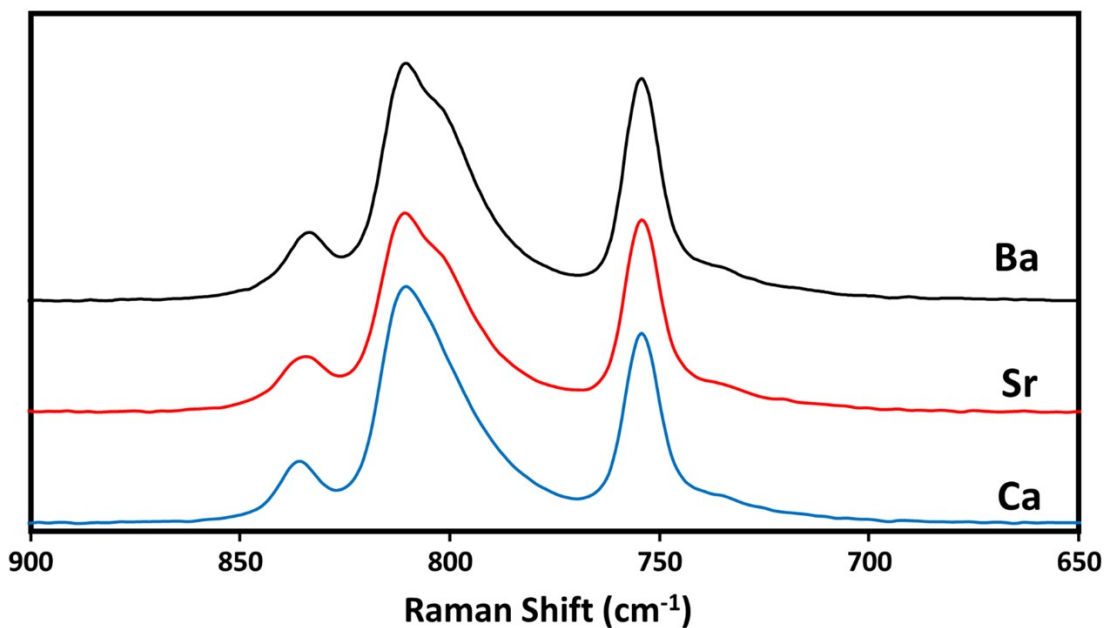

**Figure SI10.** Comparison of the Raman spectra of reaction solutions (after 4 days) with different alkaline earth cations (AE =  $\text{Ca}^{2+}$ ,  $\text{Sr}^{2+}$  and  $\text{Ba}^{2+}$ ). These solutions are obtained from a mixture of  $\text{UO}_2(\text{NO}_3)_2$  (0.04 mmol),  $\text{AECl}_2$  (0.01 mmol), TMAOH (1.7 mmol),  $\text{H}_2\text{O}_2$  (5 mmol) and 2 ml DI water. Raman spectra of  $\text{Ba}^{2+}$  and  $\text{Sr}^{2+}$  are very similar. However, the Raman spectrum of  $\text{Ca}^{2+}$  is slightly different, especially the shape of the peak located around 810  $\text{cm}^{-1}$ . This difference is probably due to the difference of uranyl capsules in solution (for Ba and Sr:  $\text{U}_{28}/\text{U}_{24}$ ; for Ca:  $\text{U}_{44}$ ).

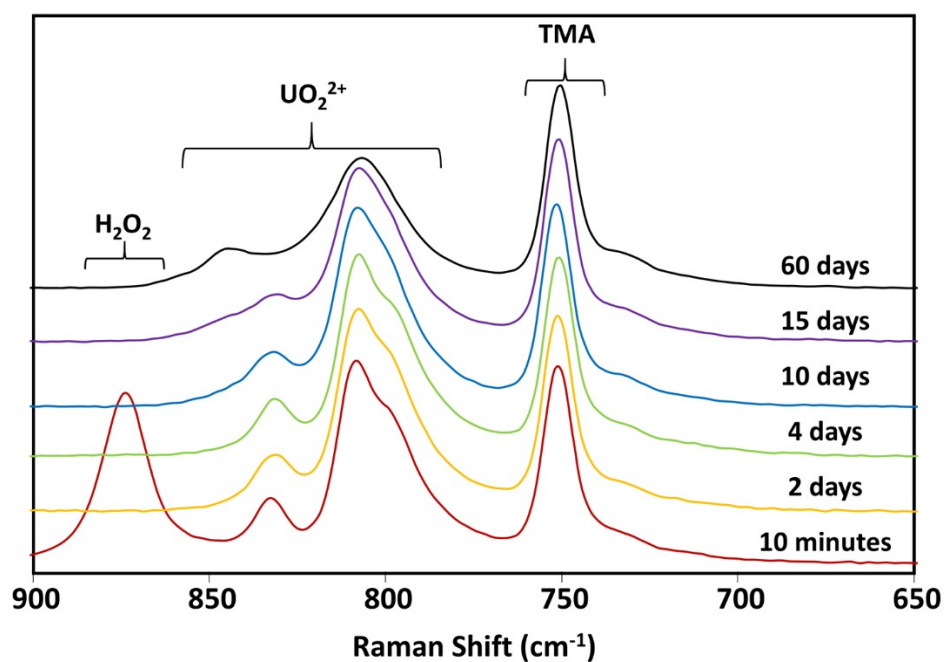

**Figure SI11.** Raman kinetic study of the reaction solution "Sr@U<sub>24</sub>" from 10 minutes to 60 days. This reactant solution corresponds to a mixture of UO<sub>2</sub>(NO<sub>3</sub>)<sub>2</sub> (0.04 mmol), SrCl<sub>2</sub> (0.01 mmol), TMAOH (1.7mmol), H<sub>2</sub>O<sub>2</sub> (5mmol) and 2ml DI water.

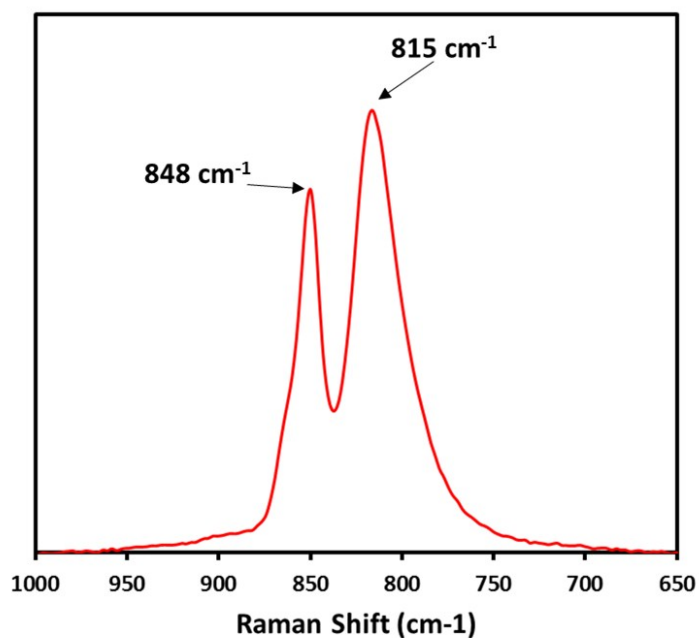

**Figure SI12.** Raman spectrum of the solid Sr@U<sub>24</sub>
